# Supplementary material for: Humidifier Disinfectant Consumption and Humidifier Disinfectant-Associated Lung Injury in South Korea: A Nationwide Population-Based Study
Source: MDPI journal article supplement (doi:10.3390/ijerph18116136), 2021-06-06
Supplement: s1 [file s1]

Supplementary Table S1. Annual trends in the absolute number of NHIS-recorded cases of J68.4, J84.9, J95.2, and S27.3 in South Korea during 2002-2017

|                                                                                   | Annual reported cases, N |                   |       |       |       |       |       |       |       |        |        |        |        |        |        |        |        |
|-----------------------------------------------------------------------------------|--------------------------|-------------------|-------|-------|-------|-------|-------|-------|-------|--------|--------|--------|--------|--------|--------|--------|--------|
|                                                                                   | Total                    | 2002 <sup>a</sup> | 2003  | 2004  | 2005  | 2006  | 2007  | 2008  | 2009  | 2010   | 2011   | 2012   | 2013   | 2014   | 2015   | 2016   | 2017   |
| J68.4 (chronic respiratory conditions due to chemicals, gases, fumes, and vapors) |                          |                   |       |       |       |       |       |       |       |        |        |        |        |        |        |        |        |
| Overall                                                                           | 1,546                    | 28                | 42    | 54    | 53    | 49    | 45    | 54    | 72    | 79     | 147    | 130    | 134    | 119    | 151    | 240    | 149    |
| Sex                                                                               |                          |                   |       |       |       |       |       |       |       |        |        |        |        |        |        |        |        |
| Male                                                                              | 927                      | 17                | 27    | 30    | 29    | 31    | 22    | 39    | 39    | 49     | 86     | 73     | 84     | 72     | 79     | 172    | 78     |
| Female                                                                            | 619                      | 11                | 15    | 24    | 24    | 18    | 23    | 15    | 33    | 30     | 61     | 57     | 50     | 47     | 72     | 68     | 71     |
| Age                                                                               |                          |                   |       |       |       |       |       |       |       |        |        |        |        |        |        |        |        |
| 0-6 years                                                                         | 62                       | 2                 | 1     | 0     | 0     | 1     | 2     | 1     | 5     | 2      | 6      | 2      | 7      | 5      | 4      | 13     | 11     |
| 7-19 years                                                                        | 72                       | 0                 | 1     | 3     | 2     | 6     | 2     | 4     | 2     | 2      | 9      | 2      | 6      | 1      | 6      | 11     | 15     |
| 20-64 years                                                                       | 881                      | 13                | 22    | 37    | 37    | 30    | 31    | 33    | 49    | 48     | 81     | 84     | 73     | 70     | 96     | 101    | 76     |
| ≥65 years                                                                         | 531                      | 13                | 18    | 14    | 14    | 12    | 10    | 16    | 16    | 27     | 51     | 42     | 48     | 43     | 45     | 115    | 47     |
| J84.9 (interstitial pulmonary disease, unspecified)                               |                          |                   |       |       |       |       |       |       |       |        |        |        |        |        |        |        |        |
| Overall                                                                           | 168,163                  | 5,083             | 5,540 | 6,281 | 7,056 | 8,255 | 8,845 | 9,114 | 9,824 | 10,248 | 11,728 | 11,465 | 11,748 | 12,942 | 14,800 | 17,751 | 17,483 |
| Sex                                                                               |                          |                   |       |       |       |       |       |       |       |        |        |        |        |        |        |        |        |
| Male                                                                              | 97,315                   | 2,835             | 3,130 | 3,555 | 4,021 | 4,699 | 5,021 | 5,216 | 5,763 | 6,041  | 6,904  | 6,732  | 6,991  | 7,427  | 8,612  | 10,060 | 10,308 |
| Female                                                                            | 70,848                   | 2,248             | 2,410 | 2,726 | 3,035 | 3,556 | 3,824 | 3,898 | 4,061 | 4,207  | 4,824  | 4,733  | 4,757  | 5,515  | 6,188  | 7,691  | 7,175  |
| Age                                                                               |                          |                   |       |       |       |       |       |       |       |        |        |        |        |        |        |        |        |
| 0-6 years                                                                         | 3,241                    | 102               | 101   | 128   | 168   | 236   | 190   | 221   | 329   | 229    | 388    | 318    | 106    | 135    | 268    | 229    | 93     |
| 7-19 years                                                                        | 1,773                    | 57                | 50    | 68    | 86    | 93    | 92    | 115   | 130   | 88     | 167    | 104    | 76     | 131    | 154    | 224    | 138    |
| 20-64 years                                                                       | 66,157                   | 2,538             | 2,579 | 2,873 | 3,107 | 3,401 | 3,721 | 3,771 | 3,801 | 4,215  | 4,668  | 4,130  | 4,351  | 4,913  | 5,277  | 6,670  | 6,142  |
| ≥65 years                                                                         | 96,992                   | 2,386             | 2,810 | 3,212 | 3,695 | 4,525 | 4,842 | 5,007 | 5,564 | 5,716  | 6,505  | 6,913  | 7,215  | 7,763  | 9,101  | 10,628 | 11,110 |
| J95.2 (acute pulmonary insufficiency following non-thoracic surgery)              |                          |                   |       |       |       |       |       |       |       |        |        |        |        |        |        |        |        |
| Overall                                                                           | 1,450                    | 100               | 76    | 106   | 60    | 42    | 50    | 134   | 116   | 75     | 64     | 56     | 44     | 117    | 172    | 126    | 112    |
| Sex                                                                               |                          |                   |       |       |       |       |       |       |       |        |        |        |        |        |        |        |        |
| Male                                                                              | 709                      | 39                | 32    | 60    | 31    | 21    | 28    | 57    | 51    | 41     | 24     | 22     | 20     | 59     | 99     | 66     | 59     |
| Female                                                                            | 741                      | 61                | 44    | 46    | 29    | 21    | 22    | 77    | 65    | 34     | 40     | 34     | 24     | 58     | 73     | 60     | 53     |
| Age                                                                               |                          |                   |       |       |       |       |       |       |       |        |        |        |        |        |        |        |        |
| 0-6 years                                                                         | 18                       | 0                 | 0     | 6     | 1     | 0     | 0     | 1     | 2     | 0      | 1      | 1      | 0      | 5      | 1      | 0      | 0      |
| 7-19 years                                                                        | 33                       | 7                 | 2     | 5     | 2     | 0     | 0     | 2     | 3     | 5      | 0      | 1      | 0      | 3      | 3      | 0      | 0      |
| 20-64 years                                                                       | 657                      | 58                | 45    | 49    | 26    | 18    | 21    | 53    | 42    | 24     | 23     | 33     | 23     | 61     | 84     | 47     | 50     |
| ≥65 years                                                                         | 742                      | 35                | 29    | 46    | 31    | 24    | 29    | 78    | 69    | 46     | 40     | 21     | 21     | 48     | 84     | 79     | 62     |
| S27.3 (other injuries of lung)                                                    |                          |                   |       |       |       |       |       |       |       |        |        |        |        |        |        |        |        |
| Overall                                                                           | 4,866                    | 358               | 585   | 771   | 834   | 771   | 470   | 309   | 310   | 302    | 63     | 33     | 22     | 12     | 14     | 8      | 4      |
| Sex                                                                               |                          |                   |       |       |       |       |       |       |       |        |        |        |        |        |        |        |        |
| Male                                                                              | 3,637                    | 269               | 445   | 594   | 613   | 589   | 362   | 223   | 219   | 219    | 38     | 20     | 20     | 9      | 8      | 5      | 4      |
| Female                                                                            | 1,229                    | 89                | 140   | 177   | 221   | 182   | 108   | 86    | 91    | 83     | 25     | 13     | 2      | 3      | 6      | 3      | 0      |
| Age                                                                               |                          |                   |       |       |       |       |       |       |       |        |        |        |        |        |        |        |        |
| 0-6 years                                                                         | 150                      | 17                | 30    | 22    | 33    | 11    | 17    | 3     | 12    | 4      | 1      | 0      | 0      | 0      | 0      | 0      | 0      |
| 7-19 years                                                                        | 353                      | 30                | 45    | 59    | 62    | 36    | 43    | 28    | 26    | 20     | 2      | 1      | 0      | 0      | 0      | 0      | 1      |
| 20-64 years                                                                       | 3,372                    | 253               | 404   | 546   | 564   | 560   | 297   | 221   | 221   | 199    | 43     | 25     | 12     | 8      | 11     | 7      | 1      |
| ≥65 years                                                                         | 991                      | 58                | 106   | 144   | 175   | 164   | 113   | 57    | 51    | 79     | 17     | 7      | 10     | 4      | 3      | 1      | 2      |

<sup>a</sup> Cases in 2002 may include pre-existing cases; NHIS, National Health Insurance Service.
